# Supplementary material for: A toolkit for greater equity, diversity, and inclusion in early-career ecology funding
Source: Atypon-hosted journal article supplement (doi:10.1139/facets-2023-0065), 2024-01-01
Supplement: facets-2023-0065supplc.pdf [file facets-2023-0065supplc.pdf]

# The Stage-based Assessment of Granting for Equity, Diversity and Inclusion (SAGE) Toolkit

Helping grantmakers (e.g., foundations, funding agencies) effectively support BIPOC early-career researchers in ecology and evolution

By the Canadian Institute of Ecology and Evolution (CIEE) 2021 EDI Working Group  
Last updated February 4, 2023

## Why Equity, Diversity, and Inclusion (EDI)?

**Black, Indigenous, and other people of colour (BIPOC) are under-represented in the fields of ecology, evolution, and conservation and experience disproportionate structural and financial barriers.**<sup>1</sup> Racialized minorities and other groups have historically been marginalized in ecology, evolution, and conservation (EEC) fields and this inequality needs to be corrected. The inclusion and elevation of people with diverse backgrounds can help break down colonial influences in research practices and create avenues for reconciliation.

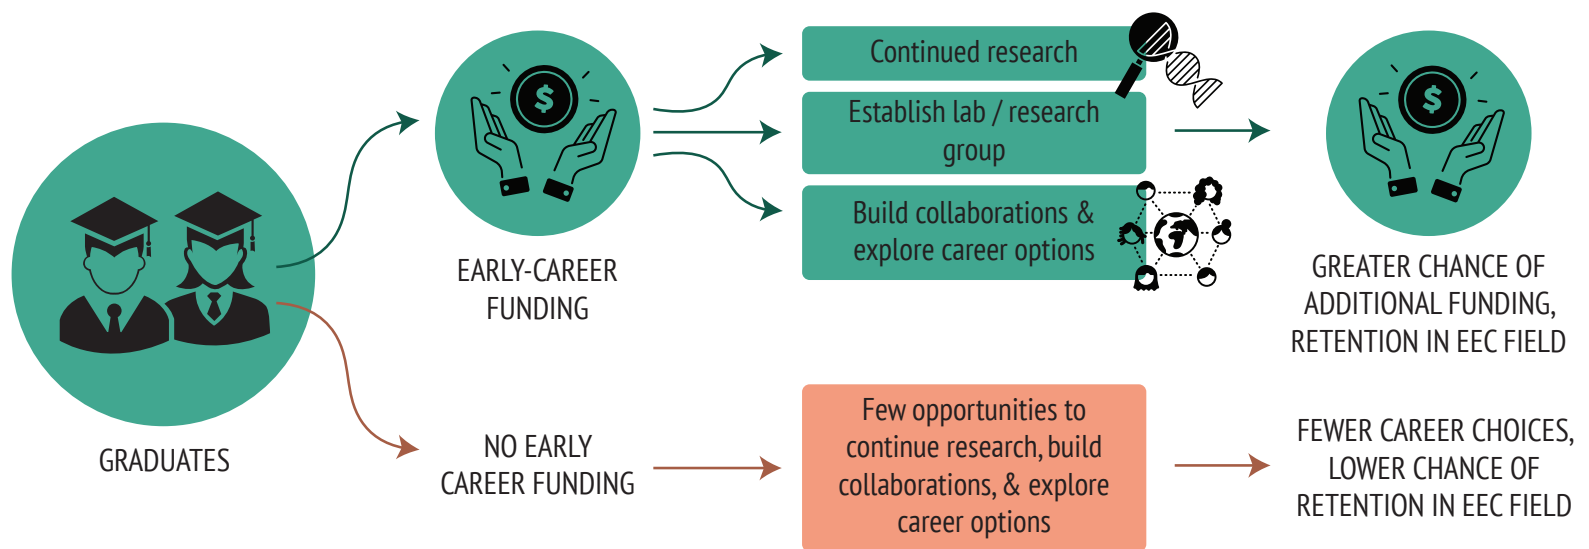

**Funding agencies can be powerful leaders for EDI, and many are already championing this movement.**

Through funding opportunities, agencies recognize they can transform Canada's research community to better reflect our country's diversity and empower aspiring researchers. EDI action plans from funding agencies such as Canada's Tri-Agency Research Councils are a promising start - but they also recognize that more needs to be done to address systemic barriers.

**Addressing EDI in funding opportunities is a complex undertaking and agencies still struggle to attract diverse applicants and disburse funding equitably.**

The Stage-based Assessment of Granting for EDI (SAGE) Toolkit helps agencies implement funding opportunities more equitably and enhance BIPOC and diverse representation and retention. To maximize impact, the SAGE toolkit focuses on early-career funding (e.g., at graduate and postdoctoral levels). Funding during this period can be a critical factor influencing whether individuals pursue a career in science and what that career looks like.

<sup>1</sup> Massey, M.D.B., Arif, S., Albury, C., and Cluney, V.A. (2021) Ecology and evolutionary biology must elevate BIPOC scholars. *Ecology Letters*, 24(5): 913-919.

## How the SAGE Toolkit Works

The SAGE toolkit identifies EDI barriers related to early-career BIPOC funding and offers suggestions to address, mitigate, or eliminate them. The guidance in the toolkit draws from existing research, interviews with early-career researchers and students, preliminary feedback from Canadian agencies that provide early-career EEC grants, and importantly, the diverse lived experiences of the members of the CIEE EDI working group.

**EDI principles must be applied every step of the way.** Barriers to EDI can occur at every stage of a funding process: **advertising, application, review, and awarding**. The SAGE toolkit breaks down each stage to help funders reflect on and support EDI in their own grant processes.

| STAGE         | CONSIDERATIONS                                                                                                                                                                                                                                                                                                                                      | QUESTIONS                                                                                                                                                                                                                                                              |
|---------------|-----------------------------------------------------------------------------------------------------------------------------------------------------------------------------------------------------------------------------------------------------------------------------------------------------------------------------------------------------|------------------------------------------------------------------------------------------------------------------------------------------------------------------------------------------------------------------------------------------------------------------------|
| 1 Advertising | Implementation: length, style, format, and accessibility of the application process<br><br>Requirements: criteria for eligibility and materials required from the applicant (e.g., transcripts)<br><br>Content: other information requested from the applicant<br><br>Support: resources, tools, and contact information available to the applicant | Is the applicant required to say how they have contributed to EDI efforts? How and why?<br><br>Does the application ask for EDI/demographic information about the applicant? How and why?<br><br>Does the application ask about non-academic experiences? How and why? |
| 2 Application |                                                                                                                                                                                                                                                                                                                                                     |                                                                                                                                                                                                                                                                        |
| 3 Review      |                                                                                                                                                                                                                                                                                                                                                     |                                                                                                                                                                                                                                                                        |
| 4 Awarding    |                                                                                                                                                                                                                                                                                                                                                     |                                                                                                                                                                                                                                                                        |

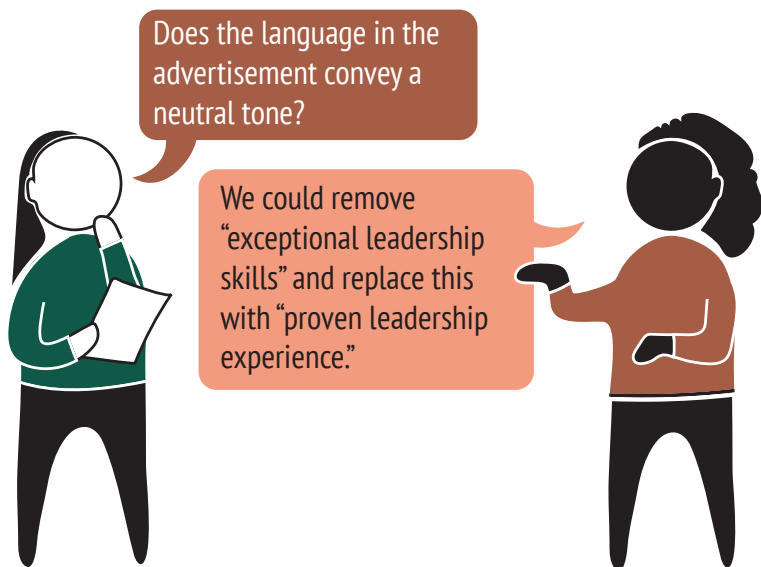

**An adaptable, informed approach.** Rather than prescribing a one-size-fits-all approach, the SAGE toolkit focuses on helping funding agencies understand key considerations related to EDI through **a series of exploratory questions**. Every funding process is different and must balance a wide range of priorities.

By answering these targeted questions, funders can build an equitable and inclusive grant process and plan that works for their needs. We also provide recommendations in response to each exploratory question as guidance.

After working through the SAGE toolkit, a funding team will have **a clear path to supporting EDI in their funding and granting**.

## Learn More

- Visit [bit.ly/ediSAGEtoolkit](https://bit.ly/ediSAGEtoolkit) to download the full SAGE toolkit today. →
- Have questions? Contact our team using the information on the following page!

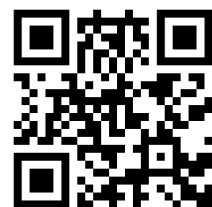

# About the CIEE Equity, Diversity, and Inclusion Working Group

**The objective of the Working Group was to identify how under-represented groups have been systematically disadvantaged in funding systems and determine ways to remove those barriers.** In 2020-21, cofounders of the working group Catherine Sun and Alys Granados noticed that funding agencies were increasingly vocally supporting EDI, but these EDI statements were not consistently translating to diverse and equitable distribution of funds in EEC. To tackle this issue, the CIEE EDI Working Group was initiated in March 2021.

The Working Group was comprised of 11 people representing a wide range of career stages in EEC from graduate students, to tenured professors, to grant administrators and reviewers. The SAGE toolkit is grounded in their diverse professional and personal experiences.\*

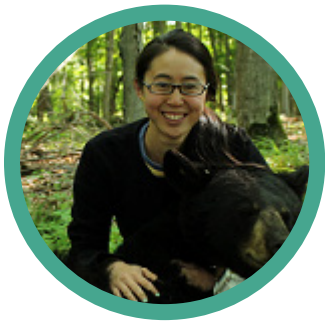

**Catherine Chi Kwon-Sun**

Postdoctoral researcher,  
University of British  
Columbia

catherine.c.sun@gmail.com

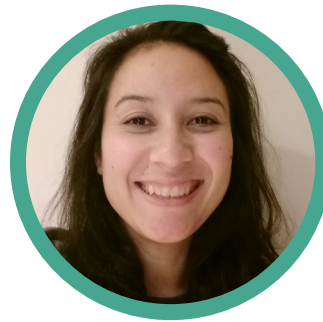

**Alys Granados**

Postdoctoral researcher,  
University of British  
Columbia

Wildlife Ecologist,  
Felidae Fund

alysgranados@gmail.com

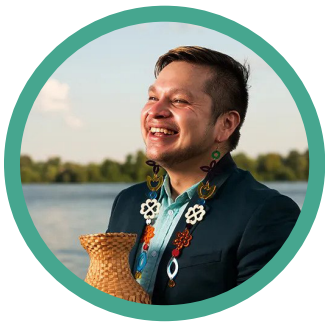

**Abraham Francis**

Environmental Services  
Manager,  
Deer Clan of Akwesasne  
(Mohawk Nation)

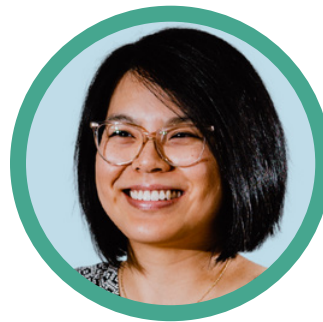

**Helen Yip**

Outreach Coordinator,  
Women in Scholarship,  
Engineering, Science and  
Technology (WISEST) -  
University of Alberta

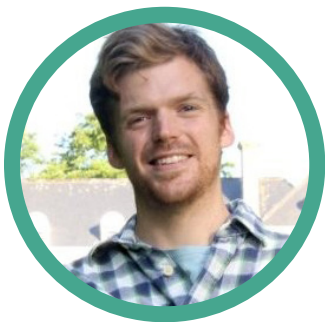

**Chris Beirne**

Postdoctoral researcher,  
University of British  
Columbia

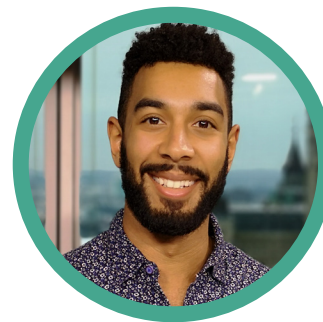

**Peter Soroye**

PhD Student,  
University of Ottawa

Outreach Coordinator,  
Wildlife Conservation  
Society (WCS) Canada

\*please note that the titles and affiliations listed reflect roles held while contributing the working group; individuals may now be affiliated with, employed, or studying elsewhere

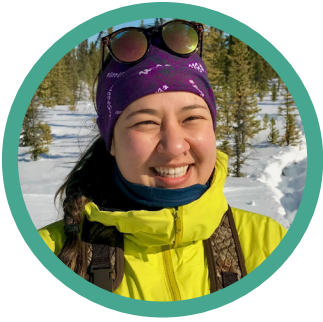

**Gillian Chow-Fraser**

Boreal Program  
Manager,  
Canadian Parks and  
Wilderness Society  
(CPAWS) - Northern  
Alberta Chapter

[gchow-fraser@cpaws.org](mailto:gchow-fraser@cpaws.org)

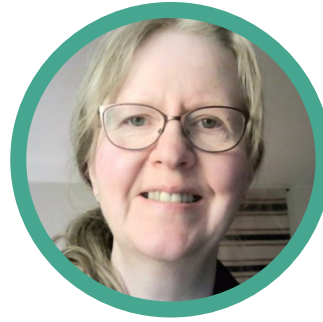

**Anita Miettunen**

Policy Analyst,  
Health Canada

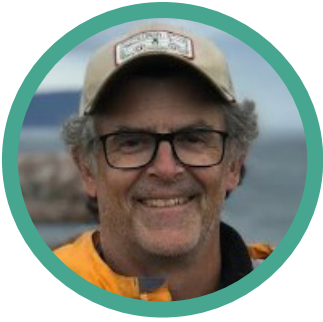

**Jeff Bowman**

Wildlife Scientist,  
Government of Ontario  
Adjunct Professor,  
Trent University

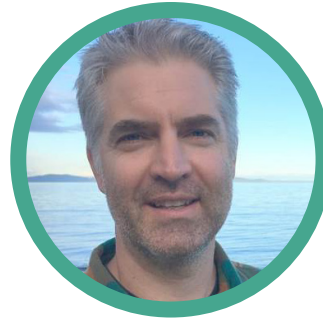

**Cole Burton**

Associate Professor,  
University of British  
Columbia

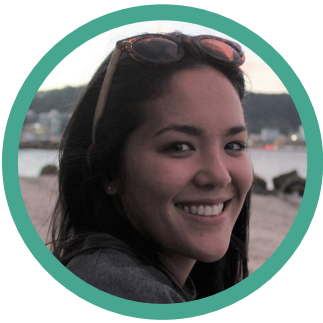

**Lian Kwong**

Biological  
Oceanographer,  
Fisheries and Oceans  
Canada

*We would like to thank Rhiannon Kirton and Vanessa Springer for their support in early stages of the working group, and our funder:*

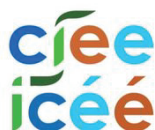

canadian institute of ecology and evolution  
institut canadien d'écologie et d'évolution

# Boîte à outils SAGE pour l'attribution de bourses en fonction de l'équité, la diversité et l'inclusion

Accompagner les organismes de financement (par exemple, les fondations, les agences de financement) dans le soutien efficace des chercheurs PANDC en écologie et en évolution

Réalisé par le groupe de travail sur l'équité, la diversité et l'inclusion de l'Institut canadien d'écologie et d'évolution (ICÉÉ)

Dernière mise à jour le 4 février 2023

## Pourquoi parler d'équité, de diversité et d'inclusion?

Les personnes autochtones, noires et de couleur (PANDC) sont sous-représentées dans les domaines de l'écologie, l'évolution et la conservation en plus de faire face à des entraves financières et structurelles indues.<sup>1</sup> Les personnes racisées et d'autres groupes ont toujours été marginalisés dans les domaines de l'écologie, l'évolution et la conservation (ÉÉC), et cette situation doit être rectifiée. En incluant et en élevant des personnes de plusieurs horizons, il est possible d'effriter les influences coloniales en recherche et ainsi ouvrir la voie vers la réconciliation.

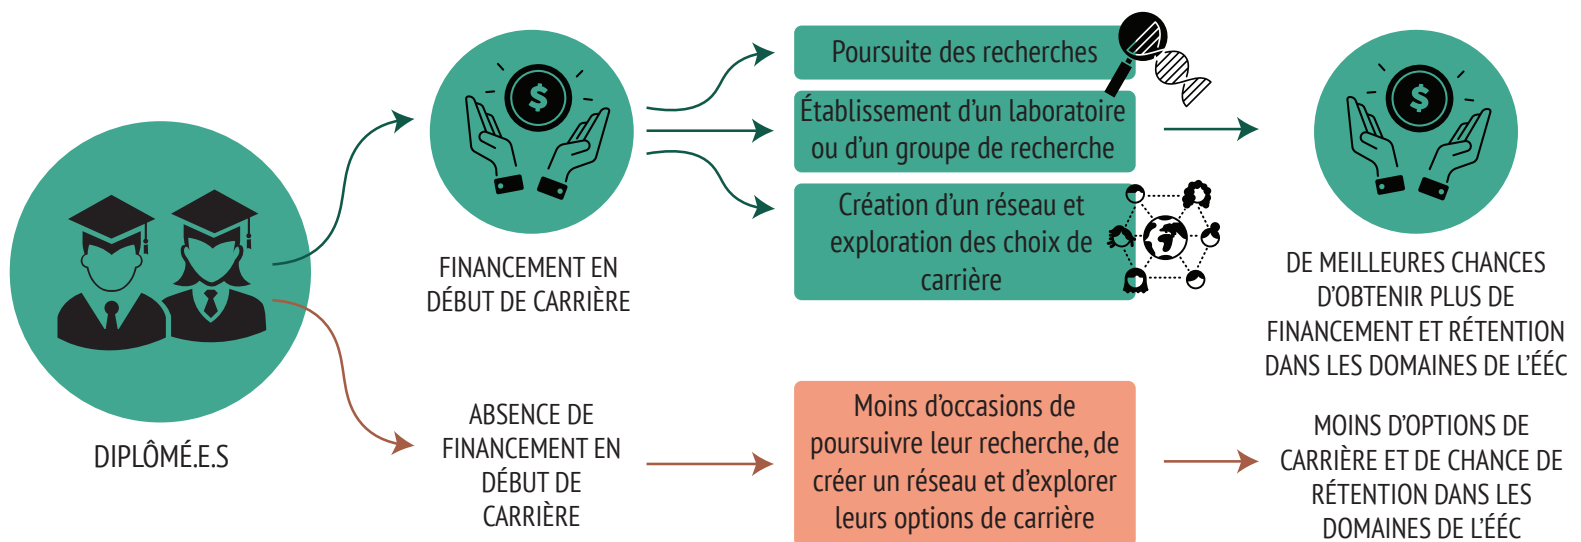

Les organismes de financement peuvent être des acteurs importants du changement en la matière, et plusieurs aspirent à devenir des chefs de file. Ces organismes reconnaissent l'impact transformateur qu'il est possible de générer à travers les occasions de financement afin de stimuler les chercheurs en herbe et mieux représenter la diversité du pays en recherche. Les plans d'action de ces organismes en matière d'équité, de diversité et d'inclusion, comme ceux des Programmes de financement des trois organismes, constituent d'excellents premiers pas. Ils reconnaissent d'ailleurs que nous devons en faire plus pour mitiger les barrières systémiques.

Prendre en compte l'équité, la diversité et l'inclusion dans les processus de financement est une tâche complexe et les agences ont encore du mal à attirer des candidats de tous horizons et à distribuer les fonds de manière équitable. La boîte à outils SAGE aide les agences à mettre en œuvre les offres de bourse de manière plus équitable et à accroître la rétention des récipiendaires. Pour maximiser son impact, la boîte à outils SAGE est axée sur le financement en début de carrière (par exemple, au niveau des études supérieures et postdoctorales). Durant cette période, le financement peut être un facteur critique qui influence la décision des personnes en ce qui a trait à la poursuite d'une carrière scientifique, ce qui a une influence sur l'ensemble de leur carrière.

1 Massey, M.D.B., Arif, S., Albury, C., and Cluney, V.A. (2021) Ecology and evolutionary biology must elevate BIPOC scholars. Ecology Letters, 24(5): 913-919.

## Comment fonctionne la boîte à outils?

La boîte à outils identifie les obstacles liés au financement des PANDC en début de carrière et offre des suggestions pour les aborder, les atténuer ou les éliminer. Les conseils de la boîte à outils s'inspirent de la recherche existante, d'entretiens avec des chercheurs et des étudiants en début de carrière, des commentaires préliminaires des organismes canadiens qui offrent des subventions précoces en ÉÉC et, surtout, des diverses expériences vécues par les membres du groupe de travail sur l'équité, la diversité et l'inclusion de l'ICÉÉ.

**Les principes d'équité, de diversité et d'inclusion doivent être respectés à chaque étape du processus.** Les obstacles qui y sont liés peuvent apparaître à chaque étape d'un processus de financement : **promotion, candidature, examen et octroi**. La boîte à outils décortique chaque étape pour aider les organismes à réfléchir aux enjeux et à appuyer les principes d'équité, de diversité et d'inclusion dans leurs processus d'octroi.

| ÉTAPES               | CONSIDÉRATIONS                                                                                 | QUESTIONS                                                                                                                                                                                                                                                                                                                                      |
|----------------------|------------------------------------------------------------------------------------------------|------------------------------------------------------------------------------------------------------------------------------------------------------------------------------------------------------------------------------------------------------------------------------------------------------------------------------------------------|
| 1 <b>Promotion</b>   | Mise en œuvre : longueur, style, format et accessibilité globale du processus de candidature   | Exigez-vous que les candidats décrivent leurs efforts en matière d'équité, de diversité et d'inclusion? Comment et pourquoi?<br>Demandez-vous des renseignements démographiques sur les candidats? Comment et pourquoi?<br>Demandez-vous des renseignements sur les activités de nature non universitaires des candidats? Comment et pourquoi? |
| 2 <b>Candidature</b> | Exigences : critères d'admissibilité et éléments requis des candidats (ex. des transcriptions) |                                                                                                                                                                                                                                                                                                                                                |
| 3 <b>Examen</b>      | Contenu : autres renseignements requis des candidats                                           |                                                                                                                                                                                                                                                                                                                                                |
| 4 <b>Octroi</b>      | Soutien : ressources, outils et coordonnées offerts aux candidats                              |                                                                                                                                                                                                                                                                                                                                                |

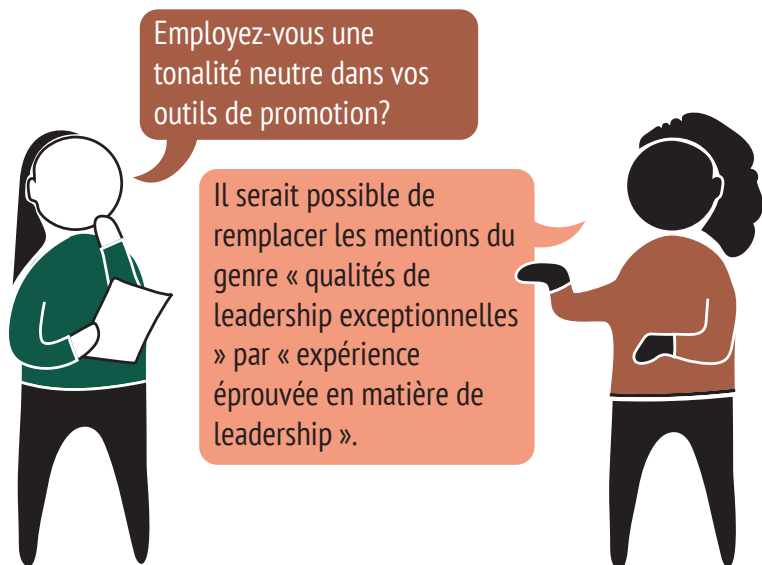

**Une démarche adaptable et éclairée.** Plutôt que de prescrire une formule passe-partout, la boîte à outils a comme but d'aider les organismes de financement à comprendre les principales considérations en la matière par l'intermédiaire d'une **série de questions exploratoires**. Chaque processus de financement est différent et doit concilier un large éventail de priorités.

En répondant à ces questions ciblées, les organismes de financement peuvent concevoir un plan et des processus d'octroi de bourse équitables et inclusifs en fonction de leurs besoins. Nous pouvons aussi fournir des recommandations supplémentaires pour orienter toutes les questions exploratoires.

Grâce à la boîte à outils, votre équipe de financement sera **outillée pour faire preuve d'équité, de diversité et d'inclusion dans leur travail**.

### En savoir plus :

- Visitez dès maintenant le [bit.ly/ediSAGEToolkit](https://bit.ly/ediSAGEToolkit) pour télécharger la boîte à outils.\* →
- Des questions? Communiquez avec nous aux coordonnées inscrites à la page suivante!

\*Veuillez noter la boîte à outils est présentement disponible seulement en anglais.

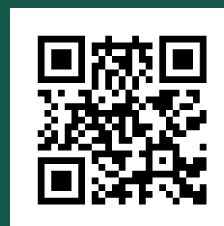

# À propos du comité de travail en équité, diversité et inclusion du ICÉE

L'objectif du groupe de travail est mettre en lumière les façons dont les personnes sous-représentées sont systématiquement désavantagées au sein du système de financement et de proposer des solutions. En 2020-21, les co-fondatrices du groupe, Catherine Sun et Alys Granados, ont constaté que les agences de recherche disaient vouloir appuyer l'équité, la diversité et l'inclusion, mais n'arrivaient pas à joindre la parole à l'acte en distribuant les fonds de manière équitable parmi les différents groupes concernés. Le comité de travail ICÉE a été créé en 2021 pour remédier à cet enjeu.

Le groupe de travail comprend 11 personnes qui représentent un large éventail de stade de carrière, partant des candidats à la maîtrise jusqu'à des professeurs titulaires, en passant par des fournisseurs de bourses et des réviseurs. Cette boîte à outils est ancrée dans leur parcours professionnel et personnel varié.\*



**Catherine Chi Kwon-Sun**

Chercheuse postdoctorale,  
University of British  
Columbia

catherine.c.sun@gmail.com

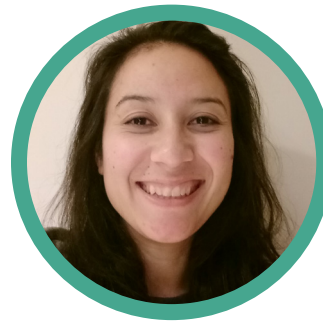

**Alys Granados**

Chercheuse postdoctorale,  
University of British  
Columbia

Écologiste de la faune,  
Felidae Fund

alysgranados@gmail.com



**Abraham Francis**

Directeur des services  
environnementaux, Deer  
Clan of Akwesasne (La  
Nation Mohawk)

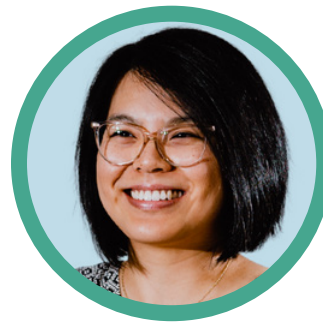

**Helen Yip**

Coordonnatrice des  
activités de sensibilisation,  
Engineering, Science and  
Technology (WISEST) -  
University of Alberta



**Chris Beirne**

Chercheur postdoctoral,  
University of British  
Columbia

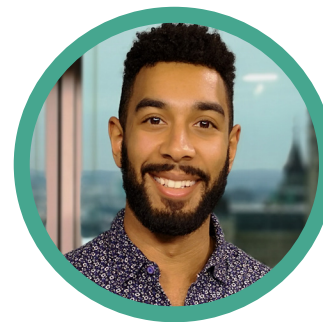

**Peter Soroye**

Doctorant,  
Université d'Ottawa

Coordinateur des activités  
de sensibilisation, Wildlife  
Conservation Society (WCS)  
Canada

\*Veuillez noter que les titres et les affiliations cités reflètent les rôles occupés pendant la contribution de ces personnes au groupe de travail; il se peut que ces personnes soient maintenant affiliées, employées ou en formation ailleurs.



### **Gillian Chow-Fraser**

Gestionnaire du Boreal Program,  
Canadian Parks and  
Wilderness Society  
(CPAWS) - Northern  
Alberta Chapter

[gchow-fraser@cpaws.org](mailto:gchow-fraser@cpaws.org)



### **Anita Miettunen**

Analyste de politiques,  
Santé Canada



### **Jeff Bowman**

Chercheur de la faune,  
Government of Ontario

Professeur adjoint,  
Trent University



### **Cole Burton**

Professeur associé,  
University of British  
Columbia



### **Lian Kwong**

Océanographe biologique,  
Pêches et Océans Canada

*Nous tenons à remercier Rhiannon Kirton et Vanessa Springer pour leur soutien au cours des premières étapes du groupe de travail, ainsi que notre bailleur de fonds :*

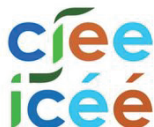

canadian institute of ecology and evolution  
institut canadien d'écologie et d'évolution

Résumé conçu par Wapiti Studios  
Traduction réalisée par Catherine Lalonde
